# Supplementary material for: Prediction and evolution of B cell epitopes of surface protein in SARS-CoV-2
Source: Virol J. 2020 Oct 29;17:165. doi: 10.1186/s12985-020-01437-4 (PMC7594941; doi:10.1186/s12985-020-01437-4)
Supplement: Supplementary file 1 — Additional file 1. Figure S1: Deep analysis of hydrophilicity and hydrophobicity of surface protein of SARS-CoV-2. The online software, ProtScale, was used to predict the hydrophilicity and hydrophobicity of the surface protein deeply. A. The S protein has a maximum score of hydrophobicity, 3.222 at the 7th site, which revealed a strong hydrophobicity; a minimum score of hydrophobicity, -2.589 at the 679th site, which revealed a strong hydrophilicity. The score of hydrophilicity and hydrophobicity on the polypeptide chain of S protein constantly fluctuates, with most of the scores being negative, which revealed the possibility that the protein had bisexual properties on the basis of hydrophilicity. B. The E protein has a maximum score of hydrophobicity, 3.489 at the 21st and the 25th site, which revealed a strong hydrophobicity; a minimum score of hydrophobicity, -1.550 at the 65th site, which revealed a strong hydrophilicity. Most of the scores of the residues being positive, which revealed the possibility that the protein has obvious hydrophobicity. C. The M protein has a maximum score of hydrophobicity, 2.978 at the 84th site, which revealed a strong hydrophobicity; a minimum score of hydrophobicity, -1.956 at the 211th and the 212th site, which revealed a strong hydrophilicity. The scores of hydrophilicity and hydrophobicity on the polypeptide chain of M protein showed large fluctuations, and the number of positive scores and negative scores were similar, the positive scores accounted for the majority, which revealed the possibility that the protein had bisexual properties on the basis of hydrophobicity. [file 12985_2020_1437_MOESM1_ESM.xlsx]

## Sheet: Sheet1
Table 4 The list of the ID of genomes in dataset
EPI_ISL_402125	EPI_ISL_416437	EPI_ISL_413564	EPI_ISL_416371	EPI_ISL_418007	EPI_ISL_414496	EPI_ISL_419919
EPI_ISL_402123	EPI_ISL_416433	EPI_ISL_413578	EPI_ISL_416368	EPI_ISL_418008	EPI_ISL_416487	EPI_ISL_419729
EPI_ISL_406798	EPI_ISL_415604	EPI_ISL_413568	EPI_ISL_413866	EPI_ISL_418268	EPI_ISL_419233	EPI_ISL_419911
EPI_ISL_402130	EPI_ISL_416438	EPI_ISL_413572	EPI_ISL_413865	EPI_ISL_420129	EPI_ISL_417010	EPI_ISL_419915
EPI_ISL_402124	EPI_ISL_416443	EPI_ISL_414543	EPI_ISL_416376	EPI_ISL_416700	EPI_ISL_419709	EPI_ISL_419905
EPI_ISL_402121	EPI_ISL_416440	EPI_ISL_413582	EPI_ISL_417182	EPI_ISL_416697	EPI_ISL_418252	EPI_ISL_419719
EPI_ISL_402128	EPI_ISL_415603	EPI_ISL_413589	EPI_ISL_412966	EPI_ISL_416721	EPI_ISL_416994	EPI_ISL_419906
EPI_ISL_403929	EPI_ISL_416650	EPI_ISL_413647	EPI_ISL_414040	EPI_ISL_417473	EPI_ISL_415704	EPI_ISL_419904
EPI_ISL_412900	EPI_ISL_416441	EPI_ISL_413648	EPI_ISL_416351	EPI_ISL_416699	EPI_ISL_418285	EPI_ISL_419913
EPI_ISL_402127	EPI_ISL_416639	EPI_ISL_418248	EPI_ISL_416359	EPI_ISL_417353	EPI_ISL_418282	EPI_ISL_419917
EPI_ISL_402132	EPI_ISL_416442	EPI_ISL_418246	EPI_ISL_416348	EPI_ISL_418780	EPI_ISL_418283	EPI_ISL_419918
EPI_ISL_412898	EPI_ISL_415598	EPI_ISL_418245	EPI_ISL_416347	EPI_ISL_416710	EPI_ISL_418281	EPI_ISL_419903
EPI_ISL_403931	EPI_ISL_415591	EPI_ISL_415703	EPI_ISL_416334	EPI_ISL_418042	EPI_ISL_418284	EPI_ISL_419920
EPI_ISL_403930	EPI_ISL_415593	EPI_ISL_415458	EPI_ISL_412873	EPI_ISL_418065	EPI_ISL_417322	EPI_ISL_419916
EPI_ISL_412899	EPI_ISL_416436	EPI_ISL_414023	EPI_ISL_413018	EPI_ISL_416421	EPI_ISL_417320	EPI_ISL_419908
EPI_ISL_402129	EPI_ISL_415626	EPI_ISL_420798	EPI_ISL_413017	EPI_ISL_418791	EPI_ISL_417324	EPI_ISL_419724
EPI_ISL_402119	EPI_ISL_416435	EPI_ISL_417174	EPI_ISL_411954	EPI_ISL_418771	EPI_ISL_417091	EPI_ISL_419922
EPI_ISL_406799	EPI_ISL_416451	EPI_ISL_416464	EPI_ISL_413856	EPI_ISL_416726	EPI_ISL_414596	EPI_ISL_419912
EPI_ISL_402120	EPI_ISL_416446	EPI_ISL_417173	EPI_ISL_416373	EPI_ISL_415539	EPI_ISL_420788	EPI_ISL_419923
EPI_ISL_408515	EPI_ISL_415597	EPI_ISL_420790	EPI_ISL_412982	EPI_ISL_417495	EPI_ISL_417323	EPI_ISL_420363
EPI_ISL_413693	EPI_ISL_415601	EPI_ISL_417171	EPI_ISL_416377	EPI_ISL_418778	EPI_ISL_417090	EPI_ISL_419264
EPI_ISL_413694	EPI_ISL_417958	EPI_ISL_420789	EPI_ISL_416314	EPI_ISL_416701	EPI_ISL_417116	EPI_ISL_420357
EPI_ISL_413692	EPI_ISL_419767	EPI_ISL_417140	EPI_ISL_416374	EPI_ISL_419392	EPI_ISL_417121	EPI_ISL_418328
EPI_ISL_406800	EPI_ISL_417032	EPI_ISL_420797	EPI_ISL_413855	EPI_ISL_418772	EPI_ISL_414639	EPI_ISL_418350
EPI_ISL_413691	EPI_ISL_419802	EPI_ISL_417162	EPI_ISL_408978	EPI_ISL_418774	EPI_ISL_417120	EPI_ISL_420085
EPI_ISL_403928	EPI_ISL_419761	EPI_ISL_413487	EPI_ISL_414043	EPI_ISL_418776	EPI_ISL_417329	EPI_ISL_420286
EPI_ISL_408514	EPI_ISL_419756	EPI_ISL_413458	EPI_ISL_416415	EPI_ISL_418059	EPI_ISL_417092	EPI_ISL_420487
EPI_ISL_414511	EPI_ISL_419760	EPI_ISL_420794	EPI_ISL_417188	EPI_ISL_417330	EPI_ISL_417102	EPI_ISL_420492
EPI_ISL_411929	EPI_ISL_417406	EPI_ISL_417141	EPI_ISL_417187	EPI_ISL_417494	EPI_ISL_414597	EPI_ISL_420284
EPI_ISL_406716	EPI_ISL_419816	EPI_ISL_416459	EPI_ISL_417184	EPI_ISL_418058	EPI_ISL_417326	EPI_ISL_420287
EPI_ISL_406717	EPI_ISL_419757	EPI_ISL_413486	EPI_ISL_416363	EPI_ISL_415544	EPI_ISL_415151	EPI_ISL_420489
EPI_ISL_406801	EPI_ISL_417398	EPI_ISL_417086	EPI_ISL_417190	EPI_ISL_416695	EPI_ISL_414363	EPI_ISL_420496
EPI_ISL_412459	EPI_ISL_417397	EPI_ISL_417139	EPI_ISL_412983	EPI_ISL_416702	EPI_ISL_416413	EPI_ISL_420283
EPI_ISL_411957	EPI_ISL_417405	EPI_ISL_420795	EPI_ISL_416364	EPI_ISL_417966	EPI_ISL_417388	EPI_ISL_420176
EPI_ISL_406030	EPI_ISL_419758	EPI_ISL_417080	EPI_ISL_416382	EPI_ISL_417492	EPI_ISL_417384	EPI_ISL_420285
EPI_ISL_405839	EPI_ISL_419763	EPI_ISL_416412	EPI_ISL_414044	EPI_ISL_418061	EPI_ISL_418797	EPI_ISL_420507
EPI_ISL_408486	EPI_ISL_417033	EPI_ISL_413597	EPI_ISL_414041	EPI_ISL_416709	EPI_ISL_420367	EPI_ISL_420488
EPI_ISL_406593	EPI_ISL_419754	EPI_ISL_416476	EPI_ISL_414042	EPI_ISL_418779	EPI_ISL_420337	EPI_ISL_420634
EPI_ISL_406592	EPI_ISL_417031	EPI_ISL_416470	EPI_ISL_410486	EPI_ISL_418049	EPI_ISL_420329	EPI_ISL_420491
EPI_ISL_403932	EPI_ISL_419666	EPI_ISL_417428	EPI_ISL_417197	EPI_ISL_416724	EPI_ISL_420331	EPI_ISL_420493
EPI_ISL_403934	EPI_ISL_418816	EPI_ISL_416471	EPI_ISL_413878	EPI_ISL_416728	EPI_ISL_420353	EPI_ISL_420054
EPI_ISL_403935	EPI_ISL_418332	EPI_ISL_416467	EPI_ISL_416380	EPI_ISL_417964	EPI_ISL_417004	EPI_ISL_419174
EPI_ISL_408484	EPI_ISL_418842	EPI_ISL_416472	EPI_ISL_417193	EPI_ISL_415541	EPI_ISL_420453	EPI_ISL_420058
EPI_ISL_403933	EPI_ISL_418855	EPI_ISL_417427	EPI_ISL_416404	EPI_ISL_417496	EPI_ISL_420325	EPI_ISL_420060
EPI_ISL_406594	EPI_ISL_418360	EPI_ISL_418986	EPI_ISL_417195	EPI_ISL_416698	EPI_ISL_420330	EPI_ISL_420052
EPI_ISL_406595	EPI_ISL_418841	EPI_ISL_416468	EPI_ISL_413877	EPI_ISL_416706	EPI_ISL_418792	EPI_ISL_419300
EPI_ISL_404227	EPI_ISL_418834	EPI_ISL_414014	EPI_ISL_414527	EPI_ISL_418788	EPI_ISL_418798	EPI_ISL_419307
EPI_ISL_408480	EPI_ISL_418347	EPI_ISL_415579	EPI_ISL_413864	EPI_ISL_416422	EPI_ISL_420344	EPI_ISL_419306
EPI_ISL_412978	EPI_ISL_418835	EPI_ISL_415584	EPI_ISL_417199	EPI_ISL_418790	EPI_ISL_420349	EPI_ISL_419675
EPI_ISL_403936	EPI_ISL_418370	EPI_ISL_413592	EPI_ISL_418815	EPI_ISL_416720	EPI_ISL_420354	EPI_ISL_418440
EPI_ISL_404228	EPI_ISL_418832	EPI_ISL_417214	EPI_ISL_416395	EPI_ISL_417517	EPI_ISL_418796	EPI_ISL_420629
EPI_ISL_403937	EPI_ISL_418845	EPI_ISL_417223	EPI_ISL_417185	EPI_ISL_418777	EPI_ISL_416997	EPI_ISL_418890
EPI_ISL_408485	EPI_ISL_418831	EPI_ISL_417218	EPI_ISL_416393	EPI_ISL_418783	EPI_ISL_420317	EPI_ISL_417027
EPI_ISL_412981	EPI_ISL_418853	EPI_ISL_417226	EPI_ISL_419213	EPI_ISL_416690	EPI_ISL_420444	EPI_ISL_418906
EPI_ISL_408481	EPI_ISL_418363	EPI_ISL_415143	EPI_ISL_412116	EPI_ISL_417478	EPI_ISL_418806	EPI_ISL_417028
EPI_ISL_412979	EPI_ISL_418374	EPI_ISL_417234	EPI_ISL_419214	EPI_ISL_416696	EPI_ISL_418863	EPI_ISL_420020
EPI_ISL_412980	EPI_ISL_418833	EPI_ISL_415138	EPI_ISL_413850	EPI_ISL_420628	EPI_ISL_420322	EPI_ISL_417026
EPI_ISL_408488	EPI_ISL_418324	EPI_ISL_415137	EPI_ISL_419217	EPI_ISL_416703	EPI_ISL_420339	EPI_ISL_417977
EPI_ISL_407313	EPI_ISL_418352	EPI_ISL_415142	EPI_ISL_414528	EPI_ISL_418057	EPI_ISL_420334	EPI_ISL_419946
EPI_ISL_408482	EPI_ISL_418342	EPI_ISL_417235	EPI_ISL_413875	EPI_ISL_418789	EPI_ISL_420348	EPI_ISL_419934
EPI_ISL_404895	EPI_ISL_418854	EPI_ISL_417230	EPI_ISL_413876	EPI_ISL_416725	EPI_ISL_417006	EPI_ISL_419939
EPI_ISL_406970	EPI_ISL_418669	EPI_ISL_414525	EPI_ISL_419215	EPI_ISL_417499	EPI_ISL_417005	EPI_ISL_419932
EPI_ISL_408483	EPI_ISL_418670	EPI_ISL_417247	EPI_ISL_414567	EPI_ISL_417493	EPI_ISL_416036	EPI_ISL_419948
EPI_ISL_408487	EPI_ISL_420458	EPI_ISL_417245	EPI_ISL_419216	EPI_ISL_416716	EPI_ISL_416035	EPI_ISL_419823
EPI_ISL_418507	EPI_ISL_416498	EPI_ISL_417250	EPI_ISL_416396	EPI_ISL_415542	EPI_ISL_415590	EPI_ISL_419943
EPI_ISL_418504	EPI_ISL_416500	EPI_ISL_417233	EPI_ISL_419218	EPI_ISL_418773	EPI_ISL_415586	EPI_ISL_419927
EPI_ISL_418506	EPI_ISL_416499	EPI_ISL_417225	EPI_ISL_419219	EPI_ISL_418787	EPI_ISL_418330	EPI_ISL_419938
EPI_ISL_416389	EPI_ISL_417462	EPI_ISL_414627	EPI_ISL_412969	EPI_ISL_418962	EPI_ISL_415589	EPI_ISL_419953
EPI_ISL_418442	EPI_ISL_417459	EPI_ISL_414628	EPI_ISL_412968	EPI_ISL_418782	EPI_ISL_418366	EPI_ISL_419950
EPI_ISL_408478	EPI_ISL_419532	EPI_ISL_416505	EPI_ISL_411955	EPI_ISL_416705	EPI_ISL_415588	EPI_ISL_419955
EPI_ISL_417176	EPI_ISL_419534	EPI_ISL_415650	EPI_ISL_419223	EPI_ISL_418775	EPI_ISL_418848	EPI_ISL_419952
EPI_ISL_418441	EPI_ISL_419533	EPI_ISL_416504	EPI_ISL_419222	EPI_ISL_416691	EPI_ISL_417519	EPI_ISL_419951
EPI_ISL_417064	EPI_ISL_417460	EPI_ISL_414521	EPI_ISL_419221	EPI_ISL_416420	EPI_ISL_417302	EPI_ISL_419933
EPI_ISL_414934	EPI_ISL_419530	EPI_ISL_414520	EPI_ISL_416402	EPI_ISL_418785	EPI_ISL_417241	EPI_ISL_419824
EPI_ISL_414935	EPI_ISL_417458	EPI_ISL_414439	EPI_ISL_411956	EPI_ISL_416694	EPI_ISL_417252	EPI_ISL_419936
EPI_ISL_411060	EPI_ISL_419531	EPI_ISL_413566	EPI_ISL_416408	EPI_ISL_418039	EPI_ISL_417288	EPI_ISL_419924
EPI_ISL_404253	EPI_ISL_417461	EPI_ISL_413573	EPI_ISL_413874	EPI_ISL_417497	EPI_ISL_417286	EPI_ISL_419945
EPI_ISL_408976	EPI_ISL_419301	EPI_ISL_414432	EPI_ISL_414569	EPI_ISL_416729	EPI_ISL_417303	EPI_ISL_419925
EPI_ISL_418502	EPI_ISL_416524	EPI_ISL_414429	EPI_ISL_419225	EPI_ISL_416423	EPI_ISL_418301	EPI_ISL_420036
EPI_ISL_418503	EPI_ISL_416525	EPI_ISL_413577	EPI_ISL_419226	EPI_ISL_417498	EPI_ISL_417300	EPI_ISL_419949
EPI_ISL_406531	EPI_ISL_415513	EPI_ISL_413571	EPI_ISL_416399	EPI_ISL_418784	EPI_ISL_417269	EPI_ISL_419942
EPI_ISL_406536	EPI_ISL_415503	EPI_ISL_414431	EPI_ISL_419224	EPI_ISL_415543	EPI_ISL_417260	EPI_ISL_419930
EPI_ISL_411066	EPI_ISL_415514	EPI_ISL_414444	EPI_ISL_416394	EPI_ISL_417331	EPI_ISL_417268	EPI_ISL_419947
EPI_ISL_415711	EPI_ISL_415472	EPI_ISL_413583	EPI_ISL_419227	EPI_ISL_417514	EPI_ISL_417266	EPI_ISL_419935
EPI_ISL_406533	EPI_ISL_415515	EPI_ISL_413590	EPI_ISL_416406	EPI_ISL_418781	EPI_ISL_417282	EPI_ISL_419941
EPI_ISL_412028	EPI_ISL_415505	EPI_ISL_413591	EPI_ISL_416407	EPI_ISL_418786	EPI_ISL_417267	EPI_ISL_419926
EPI_ISL_406535	EPI_ISL_415534	EPI_ISL_414423	EPI_ISL_416568	EPI_ISL_419528	EPI_ISL_415649	EPI_ISL_419931
EPI_ISL_406534	EPI_ISL_415516	EPI_ISL_413580	EPI_ISL_416579	EPI_ISL_418051	EPI_ISL_416751	EPI_ISL_419944
EPI_ISL_406036	EPI_ISL_415471	EPI_ISL_414428	EPI_ISL_416567	EPI_ISL_417403	EPI_ISL_416507	EPI_ISL_419929
EPI_ISL_406223	EPI_ISL_415501	EPI_ISL_417981	EPI_ISL_416577	EPI_ISL_420531	EPI_ISL_415651	EPI_ISL_419937
EPI_ISL_413015	EPI_ISL_415506	EPI_ISL_418244	EPI_ISL_416584	EPI_ISL_419803	EPI_ISL_418223	EPI_ISL_419928
EPI_ISL_411950	EPI_ISL_418002	EPI_ISL_418253	EPI_ISL_416574	EPI_ISL_419787	EPI_ISL_415652	EPI_ISL_419940
EPI_ISL_406538	EPI_ISL_420125	EPI_ISL_417205	EPI_ISL_416570	EPI_ISL_420539	EPI_ISL_414458	EPI_ISL_419732
EPI_ISL_418510	EPI_ISL_417956	EPI_ISL_419679	EPI_ISL_416572	EPI_ISL_419799	EPI_ISL_414430	EPI_ISL_419954
EPI_ISL_414936	EPI_ISL_417196	EPI_ISL_416486	EPI_ISL_416578	EPI_ISL_420533	EPI_ISL_414532	EPI_ISL_419956
EPI_ISL_417177	EPI_ISL_416673	EPI_ISL_415701	EPI_ISL_416581	EPI_ISL_419788	EPI_ISL_414467	EPI_ISL_418646
EPI_ISL_408479	EPI_ISL_416680	EPI_ISL_415702	EPI_ISL_416583	EPI_ISL_419792	EPI_ISL_414561	EPI_ISL_418645
EPI_ISL_418509	EPI_ISL_416644	EPI_ISL_420793	EPI_ISL_416566	EPI_ISL_420538	EPI_ISL_414471	EPI_ISL_420084
EPI_ISL_406031	EPI_ISL_416649	EPI_ISL_420784	EPI_ISL_416576	EPI_ISL_419785	EPI_ISL_414454	EPI_ISL_420174
EPI_ISL_418508	EPI_ISL_416669	EPI_ISL_417079	EPI_ISL_416571	EPI_ISL_419790	EPI_ISL_417988	EPI_ISL_420277
EPI_ISL_410720	EPI_ISL_418967	EPI_ISL_417074	EPI_ISL_416582	EPI_ISL_419793	EPI_ISL_414598	EPI_ISL_420280
EPI_ISL_406597	EPI_ISL_416655	EPI_ISL_417088	EPI_ISL_416569	EPI_ISL_419789	EPI_ISL_419238	EPI_ISL_420278
EPI_ISL_406596	EPI_ISL_417959	EPI_ISL_417078	EPI_ISL_416580	EPI_ISL_418801	EPI_ISL_419230	EPI_ISL_420282
EPI_ISL_410532	EPI_ISL_416674	EPI_ISL_417068	EPI_ISL_416565	EPI_ISL_419791	EPI_ISL_418433	EPI_ISL_420499
EPI_ISL_406034	EPI_ISL_416678	EPI_ISL_417087	EPI_ISL_416573	EPI_ISL_419794	EPI_ISL_418435	EPI_ISL_420279
EPI_ISL_407893	EPI_ISL_416647	EPI_ISL_417076	EPI_ISL_416575	EPI_ISL_417407	EPI_ISL_418436	EPI_ISL_420281
EPI_ISL_416410	EPI_ISL_414648	EPI_ISL_417175	EPI_ISL_412965	EPI_ISL_419662	EPI_ISL_418434	EPI_ISL_420175
EPI_ISL_417030	EPI_ISL_416450	EPI_ISL_417082	EPI_ISL_416603	EPI_ISL_417018	EPI_ISL_413650	EPI_ISL_420276
EPI_ISL_414938	EPI_ISL_416668	EPI_ISL_420785	EPI_ISL_416590	EPI_ISL_417017	EPI_ISL_417163	EPI_ISL_419175
EPI_ISL_411926	EPI_ISL_416679	EPI_ISL_417170	EPI_ISL_416597	EPI_ISL_418631	EPI_ISL_413926	EPI_ISL_419176
EPI_ISL_418511	EPI_ISL_416448	EPI_ISL_417085	EPI_ISL_416601	EPI_ISL_418625	EPI_ISL_417103	EPI_ISL_419173
EPI_ISL_411953	EPI_ISL_416653	EPI_ISL_417072	EPI_ISL_416595	EPI_ISL_417019	EPI_ISL_414588	EPI_ISL_419169
EPI_ISL_413485	EPI_ISL_417316	EPI_ISL_417084	EPI_ISL_416594	EPI_ISL_418627	EPI_ISL_413924	EPI_ISL_419172
EPI_ISL_416046	EPI_ISL_416675	EPI_ISL_417075	EPI_ISL_416602	EPI_ISL_418623	EPI_ISL_417128	EPI_ISL_419171
EPI_ISL_411952	EPI_ISL_416449	EPI_ISL_417317	EPI_ISL_416591	EPI_ISL_417934	EPI_ISL_417109	EPI_ISL_419170
EPI_ISL_416411	EPI_ISL_416640	EPI_ISL_417089	EPI_ISL_416599	EPI_ISL_418323	EPI_ISL_417127	EPI_ISL_420567
EPI_ISL_406844	EPI_ISL_416654	EPI_ISL_417073	EPI_ISL_416589	EPI_ISL_418335	EPI_ISL_417114	EPI_ISL_418892
EPI_ISL_408977	EPI_ISL_418965	EPI_ISL_420792	EPI_ISL_416596	EPI_ISL_418373	EPI_ISL_413653	EPI_ISL_418903
EPI_ISL_418327	EPI_ISL_416659	EPI_ISL_417077	EPI_ISL_416587	EPI_ISL_417525	EPI_ISL_417167	EPI_ISL_417204
EPI_ISL_413014	EPI_ISL_416656	EPI_ISL_417144	EPI_ISL_416586	EPI_ISL_417524	EPI_ISL_417133	EPI_ISL_417201
EPI_ISL_414940	EPI_ISL_416648	EPI_ISL_417169	EPI_ISL_416604	EPI_ISL_418234	EPI_ISL_417136	EPI_ISL_417202
EPI_ISL_411915	EPI_ISL_416646	EPI_ISL_417113	EPI_ISL_416605	EPI_ISL_419541	EPI_ISL_414367	EPI_ISL_418893
EPI_ISL_418513	EPI_ISL_420029	EPI_ISL_417112	EPI_ISL_416606	EPI_ISL_419536	EPI_ISL_417122	EPI_ISL_417203
EPI_ISL_416316	EPI_ISL_420028	EPI_ISL_417081	EPI_ISL_416588	EPI_ISL_417464	EPI_ISL_417111	EPI_ISL_417200
EPI_ISL_416317	EPI_ISL_416641	EPI_ISL_413562	EPI_ISL_416592	EPI_ISL_417465	EPI_ISL_417132	EPI_ISL_419960
EPI_ISL_418514	EPI_ISL_416657	EPI_ISL_413601	EPI_ISL_416585	EPI_ISL_419537	EPI_ISL_417138	EPI_ISL_419829
EPI_ISL_418515	EPI_ISL_416658	EPI_ISL_413600	EPI_ISL_416598	EPI_ISL_419538	EPI_ISL_417126	EPI_ISL_419981
EPI_ISL_416044	EPI_ISL_419711	EPI_ISL_417383	EPI_ISL_416600	EPI_ISL_417466	EPI_ISL_414595	EPI_ISL_419975
EPI_ISL_418512	EPI_ISL_416652	EPI_ISL_419657	EPI_ISL_416593	EPI_ISL_418259	EPI_ISL_417130	EPI_ISL_419827
EPI_ISL_417178	EPI_ISL_416642	EPI_ISL_419654	EPI_ISL_419229	EPI_ISL_418256	EPI_ISL_413651	EPI_ISL_419964
EPI_ISL_415709	EPI_ISL_416651	EPI_ISL_417429	EPI_ISL_419228	EPI_ISL_418255	EPI_ISL_413925	EPI_ISL_419959
EPI_ISL_414939	EPI_ISL_419713	EPI_ISL_417430	EPI_ISL_416627	EPI_ISL_418258	EPI_ISL_413922	EPI_ISL_419978
EPI_ISL_407084	EPI_ISL_416676	EPI_ISL_415153	EPI_ISL_416613	EPI_ISL_417453	EPI_ISL_417129	EPI_ISL_419970
EPI_ISL_410531	EPI_ISL_416643	EPI_ISL_416475	EPI_ISL_416634	EPI_ISL_416692	EPI_ISL_417157	EPI_ISL_419825
EPI_ISL_407193	EPI_ISL_416645	EPI_ISL_416469	EPI_ISL_416611	EPI_ISL_417369	EPI_ISL_413931	EPI_ISL_419968
EPI_ISL_407215	EPI_ISL_416681	EPI_ISL_416028	EPI_ISL_416623	EPI_ISL_416714	EPI_ISL_414593	EPI_ISL_419957
EPI_ISL_407214	EPI_ISL_419762	EPI_ISL_416033	EPI_ISL_416625	EPI_ISL_418969	EPI_ISL_417123	EPI_ISL_419965
EPI_ISL_413518	EPI_ISL_419759	EPI_ISL_418824	EPI_ISL_416607	EPI_ISL_419396	EPI_ISL_414366	EPI_ISL_419973
EPI_ISL_414937	EPI_ISL_419768	EPI_ISL_415583	EPI_ISL_416629	EPI_ISL_419395	EPI_ISL_417319	EPI_ISL_419828
EPI_ISL_416042	EPI_ISL_419766	EPI_ISL_417243	EPI_ISL_416612	EPI_ISL_416712	EPI_ISL_414364	EPI_ISL_419958
EPI_ISL_416473	EPI_ISL_419769	EPI_ISL_417253	EPI_ISL_416617	EPI_ISL_416523	EPI_ISL_417131	EPI_ISL_419976
EPI_ISL_410044	EPI_ISL_419764	EPI_ISL_417242	EPI_ISL_416624	EPI_ISL_420805	EPI_ISL_415605	EPI_ISL_419967
EPI_ISL_407894	EPI_ISL_419777	EPI_ISL_417220	EPI_ISL_416610	EPI_ISL_417455	EPI_ISL_413652	EPI_ISL_419977
EPI_ISL_413520	EPI_ISL_419770	EPI_ISL_417246	EPI_ISL_416632	EPI_ISL_417452	EPI_ISL_414368	EPI_ISL_419963
EPI_ISL_416319	EPI_ISL_417404	EPI_ISL_417249	EPI_ISL_416622	EPI_ISL_416687	EPI_ISL_413928	EPI_ISL_419974
EPI_ISL_416474	EPI_ISL_419826	EPI_ISL_417239	EPI_ISL_416619	EPI_ISL_418070	EPI_ISL_414594	EPI_ISL_419980
EPI_ISL_416321	EPI_ISL_419779	EPI_ISL_416740	EPI_ISL_416626	EPI_ISL_418060	EPI_ISL_417124	EPI_ISL_419969
EPI_ISL_416320	EPI_ISL_419784	EPI_ISL_416732	EPI_ISL_416608	EPI_ISL_418044	EPI_ISL_418865	EPI_ISL_419961
EPI_ISL_411927	EPI_ISL_419776	EPI_ISL_417238	EPI_ISL_416630	EPI_ISL_418062	EPI_ISL_413649	EPI_ISL_419962
EPI_ISL_413521	EPI_ISL_418336	EPI_ISL_417231	EPI_ISL_416616	EPI_ISL_416424	EPI_ISL_417107	EPI_ISL_419966
EPI_ISL_416327	EPI_ISL_418361	EPI_ISL_417240	EPI_ISL_416620	EPI_ISL_419394	EPI_ISL_417387	EPI_ISL_419972
EPI_ISL_416318	EPI_ISL_418367	EPI_ISL_416730	EPI_ISL_416609	EPI_ISL_418196	EPI_ISL_417385	EPI_ISL_419979
EPI_ISL_413519	EPI_ISL_418329	EPI_ISL_417257	EPI_ISL_416621	EPI_ISL_418964	EPI_ISL_416414	EPI_ISL_419971
EPI_ISL_411220	EPI_ISL_418357	EPI_ISL_417237	EPI_ISL_416633	EPI_ISL_417449	EPI_ISL_419658	EPI_ISL_419830
EPI_ISL_411219	EPI_ISL_418843	EPI_ISL_414501	EPI_ISL_416618	EPI_ISL_419390	EPI_ISL_420356	EPI_ISL_419673
EPI_ISL_406862	EPI_ISL_418846	EPI_ISL_417256	EPI_ISL_416615	EPI_ISL_418963	EPI_ISL_420341	EPI_ISL_418651
EPI_ISL_410045	EPI_ISL_418351	EPI_ISL_417251	EPI_ISL_416628	EPI_ISL_417503	EPI_ISL_420347	EPI_ISL_418658
EPI_ISL_412967	EPI_ISL_418376	EPI_ISL_416731	EPI_ISL_416614	EPI_ISL_418069	EPI_ISL_418794	EPI_ISL_418664
EPI_ISL_416322	EPI_ISL_418372	EPI_ISL_417228	EPI_ISL_416631	EPI_ISL_416686	EPI_ISL_418795	EPI_ISL_418663
EPI_ISL_416350	EPI_ISL_418847	EPI_ISL_416737	EPI_ISL_413615	EPI_ISL_417332	EPI_ISL_420343	EPI_ISL_418648
EPI_ISL_416323	EPI_ISL_418811	EPI_ISL_415148	EPI_ISL_413616	EPI_ISL_417381	EPI_ISL_420355	EPI_ISL_418666
EPI_ISL_416324	EPI_ISL_418341	EPI_ISL_417248	EPI_ISL_413612	EPI_ISL_419397	EPI_ISL_420340	EPI_ISL_418654
EPI_ISL_407071	EPI_ISL_418844	EPI_ISL_417244	EPI_ISL_413614	EPI_ISL_416688	EPI_ISL_420326	EPI_ISL_418650
EPI_ISL_407073	EPI_ISL_418358	EPI_ISL_417227	EPI_ISL_414484	EPI_ISL_419391	EPI_ISL_420336	EPI_ISL_418653
EPI_ISL_410984	EPI_ISL_418812	EPI_ISL_414526	EPI_ISL_413606	EPI_ISL_418068	EPI_ISL_420328	EPI_ISL_418661
EPI_ISL_408431	EPI_ISL_418356	EPI_ISL_416506	EPI_ISL_413613	EPI_ISL_417502	EPI_ISL_420345	EPI_ISL_418655
EPI_ISL_408430	EPI_ISL_418840	EPI_ISL_414629	EPI_ISL_414483	EPI_ISL_417448	EPI_ISL_420449	EPI_ISL_418647
EPI_ISL_410545	EPI_ISL_418375	EPI_ISL_414630	EPI_ISL_413621	EPI_ISL_419393	EPI_ISL_418981	EPI_ISL_418657
EPI_ISL_412974	EPI_ISL_418337	EPI_ISL_416746	EPI_ISL_413607	EPI_ISL_419388	EPI_ISL_420321	EPI_ISL_418660
EPI_ISL_408669	EPI_ISL_418838	EPI_ISL_414507	EPI_ISL_414479	EPI_ISL_418041	EPI_ISL_420342	EPI_ISL_418652
EPI_ISL_408665	EPI_ISL_418368	EPI_ISL_417491	EPI_ISL_414482	EPI_ISL_417501	EPI_ISL_420441	EPI_ISL_418656
EPI_ISL_409067	EPI_ISL_418359	EPI_ISL_413489	EPI_ISL_413620	EPI_ISL_418035	EPI_ISL_420351	EPI_ISL_418665
EPI_ISL_408008	EPI_ISL_418338	EPI_ISL_414435	EPI_ISL_413608	EPI_ISL_420806	EPI_ISL_418805	EPI_ISL_418659
EPI_ISL_408009	EPI_ISL_418326	EPI_ISL_414425	EPI_ISL_419232	EPI_ISL_418045	EPI_ISL_420333	EPI_ISL_418649
EPI_ISL_408010	EPI_ISL_420464	EPI_ISL_414563	EPI_ISL_419241	EPI_ISL_417450	EPI_ISL_420315	EPI_ISL_418662
EPI_ISL_407896	EPI_ISL_420463	EPI_ISL_414424	EPI_ISL_416315	EPI_ISL_417500	EPI_ISL_420446	EPI_ISL_420501
EPI_ISL_413851	EPI_ISL_420292	EPI_ISL_414443	EPI_ISL_419231	EPI_ISL_416684	EPI_ISL_420335	EPI_ISL_420270
EPI_ISL_416344	EPI_ISL_420462	EPI_ISL_413579	EPI_ISL_418325	EPI_ISL_420804	EPI_ISL_417425	EPI_ISL_420504
EPI_ISL_413889	EPI_ISL_420040	EPI_ISL_414449	EPI_ISL_415577	EPI_ISL_418055	EPI_ISL_420350	EPI_ISL_420273
EPI_ISL_417183	EPI_ISL_418227	EPI_ISL_414427	EPI_ISL_412973	EPI_ISL_417509	EPI_ISL_420332	EPI_ISL_420274
EPI_ISL_413852	EPI_ISL_420039	EPI_ISL_414438	EPI_ISL_413459	EPI_ISL_416515	EPI_ISL_418818	EPI_ISL_420238
EPI_ISL_416326	EPI_ISL_418229	EPI_ISL_413587	EPI_ISL_413618	EPI_ISL_419801	EPI_ISL_417296	EPI_ISL_420500
EPI_ISL_417179	EPI_ISL_418228	EPI_ISL_413584	EPI_ISL_413617	EPI_ISL_419804	EPI_ISL_417308	EPI_ISL_420503
EPI_ISL_413860	EPI_ISL_419309	EPI_ISL_414440	EPI_ISL_413456	EPI_ISL_419800	EPI_ISL_417272	EPI_ISL_420502
EPI_ISL_416349	EPI_ISL_419303	EPI_ISL_414442	EPI_ISL_419832	EPI_ISL_419798	EPI_ISL_417290	EPI_ISL_420505
EPI_ISL_416366	EPI_ISL_419302	EPI_ISL_414436	EPI_ISL_419831	EPI_ISL_419797	EPI_ISL_417297	EPI_ISL_420498
EPI_ISL_412029	EPI_ISL_415475	EPI_ISL_414441	EPI_ISL_418218	EPI_ISL_419795	EPI_ISL_417285	EPI_ISL_420497
EPI_ISL_416346	EPI_ISL_415528	EPI_ISL_414560	EPI_ISL_417137	EPI_ISL_419815	EPI_ISL_417261	EPI_ISL_420275
EPI_ISL_416331	EPI_ISL_415485	EPI_ISL_414460	EPI_ISL_414480	EPI_ISL_420536	EPI_ISL_417262	EPI_ISL_420635
EPI_ISL_413858	EPI_ISL_415477	EPI_ISL_414562	EPI_ISL_414481	EPI_ISL_419809	EPI_ISL_417309	EPI_ISL_419186
EPI_ISL_416385	EPI_ISL_415535	EPI_ISL_414433	EPI_ISL_413609	EPI_ISL_419796	EPI_ISL_417275	EPI_ISL_419185
EPI_ISL_416365	EPI_ISL_415524	EPI_ISL_414549	EPI_ISL_413610	EPI_ISL_416514	EPI_ISL_417274	EPI_ISL_420605
EPI_ISL_416352	EPI_ISL_415525	EPI_ISL_414545	EPI_ISL_413611	EPI_ISL_419836	EPI_ISL_417263	EPI_ISL_419184
EPI_ISL_413888	EPI_ISL_415527	EPI_ISL_414426	EPI_ISL_419833	EPI_ISL_419663	EPI_ISL_417301	EPI_ISL_419183
EPI_ISL_416333	EPI_ISL_418005	EPI_ISL_414434	EPI_ISL_420456	EPI_ISL_417020	EPI_ISL_417271	EPI_ISL_420057
EPI_ISL_416378	EPI_ISL_418004	EPI_ISL_414437	EPI_ISL_419243	EPI_ISL_417021	EPI_ISL_417287	EPI_ISL_419181
EPI_ISL_413853	EPI_ISL_417954	EPI_ISL_414445	EPI_ISL_419244	EPI_ISL_417024	EPI_ISL_417273	EPI_ISL_419178
EPI_ISL_414941	EPI_ISL_417967	EPI_ISL_414446	EPI_ISL_414571	EPI_ISL_417025	EPI_ISL_417258	EPI_ISL_419188
EPI_ISL_413854	EPI_ISL_417957	EPI_ISL_417987	EPI_ISL_419245	EPI_ISL_418624	EPI_ISL_417283	EPI_ISL_419177
EPI_ISL_416332	EPI_ISL_420127	EPI_ISL_418010	EPI_ISL_417135	EPI_ISL_417023	EPI_ISL_417281	EPI_ISL_420606
EPI_ISL_412869	EPI_ISL_417963	EPI_ISL_417986	EPI_ISL_419834	EPI_ISL_417022	EPI_ISL_417270	EPI_ISL_419180
EPI_ISL_412870	EPI_ISL_418182	EPI_ISL_417979	EPI_ISL_419242	EPI_ISL_417936	EPI_ISL_417304	EPI_ISL_419182
EPI_ISL_419733	EPI_ISL_420126	EPI_ISL_419240	EPI_ISL_412026	EPI_ISL_418354	EPI_ISL_417289	EPI_ISL_419179
EPI_ISL_416390	EPI_ISL_417961	EPI_ISL_418249	EPI_ISL_419246	EPI_ISL_418672	EPI_ISL_416509	EPI_ISL_419187
EPI_ISL_413859	EPI_ISL_420128	EPI_ISL_419234	EPI_ISL_412862	EPI_ISL_418300	EPI_ISL_416750	EPI_ISL_418439
EPI_ISL_413857	EPI_ISL_417474	EPI_ISL_417980	EPI_ISL_419835	EPI_ISL_418677	EPI_ISL_416756	EPI_ISL_418438
EPI_ISL_416386	EPI_ISL_417477	EPI_ISL_418277	EPI_ISL_419735	EPI_ISL_420291	EPI_ISL_416510	EPI_ISL_418880
EPI_ISL_408489	EPI_ISL_416665	EPI_ISL_418279	EPI_ISL_419248	EPI_ISL_420177	EPI_ISL_417335	EPI_ISL_418871
EPI_ISL_410546	EPI_ISL_416667	EPI_ISL_418280	EPI_ISL_414519	EPI_ISL_418412	EPI_ISL_417336	EPI_ISL_418894
EPI_ISL_408666	EPI_ISL_416722	EPI_ISL_418278	EPI_ISL_419247	EPI_ISL_418231	EPI_ISL_416754	EPI_ISL_420022
EPI_ISL_408667	EPI_ISL_416635	EPI_ISL_417104	EPI_ISL_417446	EPI_ISL_418233	EPI_ISL_416753	EPI_ISL_420021
EPI_ISL_412871	EPI_ISL_420803	EPI_ISL_417118	EPI_ISL_417445	EPI_ISL_418414	EPI_ISL_416508	EPI_ISL_418899
EPI_ISL_408670	EPI_ISL_416663	EPI_ISL_417110	EPI_ISL_417447	EPI_ISL_418413	EPI_ISL_414470	EPI_ISL_418882
EPI_ISL_413746	EPI_ISL_417960	EPI_ISL_417069	EPI_ISL_413565	EPI_ISL_418415	EPI_ISL_414459	EPI_ISL_420002
EPI_ISL_413752	EPI_ISL_417470	EPI_ISL_420787	EPI_ISL_413996	EPI_ISL_418232	EPI_ISL_414550	EPI_ISL_419999
EPI_ISL_416338	EPI_ISL_416671	EPI_ISL_417065	EPI_ISL_412970	EPI_ISL_419543	EPI_ISL_414453	EPI_ISL_419984
EPI_ISL_416379	EPI_ISL_419708	EPI_ISL_417325	EPI_ISL_413623	EPI_ISL_419539	EPI_ISL_414566	EPI_ISL_420001
EPI_ISL_413886	EPI_ISL_417480	EPI_ISL_413563	EPI_ISL_416462	EPI_ISL_419545	EPI_ISL_414558	EPI_ISL_419987
EPI_ISL_416356	EPI_ISL_416664	EPI_ISL_417066	EPI_ISL_416463	EPI_ISL_419547	EPI_ISL_414457	EPI_ISL_419982
EPI_ISL_416336	EPI_ISL_419710	EPI_ISL_417105	EPI_ISL_413622	EPI_ISL_419548	EPI_ISL_414534	EPI_ISL_419990
EPI_ISL_413748	EPI_ISL_416662	EPI_ISL_416466	EPI_ISL_414485	EPI_ISL_417467	EPI_ISL_414451	EPI_ISL_419993
EPI_ISL_413761	EPI_ISL_416638	EPI_ISL_417106	EPI_ISL_412964	EPI_ISL_419546	EPI_ISL_414547	EPI_ISL_419995
EPI_ISL_416357	EPI_ISL_417192	EPI_ISL_417070	EPI_ISL_414691	EPI_ISL_419544	EPI_ISL_414546	EPI_ISL_419992
EPI_ISL_416375	EPI_ISL_416666	EPI_ISL_417071	EPI_ISL_414517	EPI_ISL_419549	EPI_ISL_414535	EPI_ISL_420000
EPI_ISL_413711	EPI_ISL_417475	EPI_ISL_417117	EPI_ISL_419249	EPI_ISL_419542	EPI_ISL_414452	EPI_ISL_420003
EPI_ISL_416361	EPI_ISL_418205	EPI_ISL_417115	EPI_ISL_414663	EPI_ISL_418019	EPI_ISL_414468	EPI_ISL_419991
EPI_ISL_413884	EPI_ISL_417198	EPI_ISL_417067	EPI_ISL_414688	EPI_ISL_418009	EPI_ISL_414533	EPI_ISL_419986
EPI_ISL_413753	EPI_ISL_417472	EPI_ISL_420786	EPI_ISL_414689	EPI_ISL_418022	EPI_ISL_414556	EPI_ISL_419985
EPI_ISL_416329	EPI_ISL_416693	EPI_ISL_417386	EPI_ISL_414687	EPI_ISL_418860	EPI_ISL_414455	EPI_ISL_419997
EPI_ISL_413791	EPI_ISL_416677	EPI_ISL_413599	EPI_ISL_414692	EPI_ISL_419524	EPI_ISL_414450	EPI_ISL_419988
EPI_ISL_416381	EPI_ISL_417194	EPI_ISL_413598	EPI_ISL_414009	EPI_ISL_418076	EPI_ISL_418012	EPI_ISL_419998
EPI_ISL_416383	EPI_ISL_416637	EPI_ISL_420534	EPI_ISL_417215	EPI_ISL_418078	EPI_ISL_417990	EPI_ISL_419994
EPI_ISL_413697	EPI_ISL_417351	EPI_ISL_418988	EPI_ISL_417216	EPI_ISL_418080	EPI_ISL_417206	EPI_ISL_419989
EPI_ISL_413729	EPI_ISL_417469	EPI_ISL_417424	EPI_ISL_414005	EPI_ISL_418072	EPI_ISL_419690	EPI_ISL_419996
EPI_ISL_412030	EPI_ISL_416661	EPI_ISL_420442	EPI_ISL_414623	EPI_ISL_417382	EPI_ISL_415706	EPI_ISL_419983
EPI_ISL_416328	EPI_ISL_416636	EPI_ISL_418270	EPI_ISL_412912	EPI_ISL_418081	EPI_ISL_418437	EPI_ISL_419664
EPI_ISL_416360	EPI_ISL_417476	EPI_ISL_420448	EPI_ISL_414497	EPI_ISL_418197	EPI_ISL_415705	EPI_ISL_420411
EPI_ISL_413887	EPI_ISL_417479	EPI_ISL_420447	EPI_ISL_418251	EPI_ISL_418077	EPI_ISL_416416	EPI_ISL_420397
EPI_ISL_416341	EPI_ISL_417471	EPI_ISL_418989	EPI_ISL_413619	EPI_ISL_417377	EPI_ISL_417125	EPI_ISL_420372
EPI_ISL_413809	EPI_ISL_416670	EPI_ISL_420324	EPI_ISL_419656	EPI_ISL_417505	EPI_ISL_417119	EPI_ISL_420398
EPI_ISL_416372	EPI_ISL_419772	EPI_ISL_420443	EPI_ISL_419655	EPI_ISL_418079	EPI_ISL_414592	EPI_ISL_420432
EPI_ISL_413863	EPI_ISL_417402	EPI_ISL_420319	EPI_ISL_419252	EPI_ISL_418968	EPI_ISL_414591	EPI_ISL_420396
EPI_ISL_413749	EPI_ISL_419775	EPI_ISL_417426	EPI_ISL_419251	EPI_ISL_418071	EPI_ISL_414365	EPI_ISL_420371
EPI_ISL_413750	EPI_ISL_419771	EPI_ISL_417422	EPI_ISL_419253	EPI_ISL_420304	EPI_ISL_419736	EPI_ISL_420373
EPI_ISL_413861	EPI_ISL_419783	EPI_ISL_420314	EPI_ISL_419250	EPI_ISL_418064	EPI_ISL_419737	EPI_ISL_420386
EPI_ISL_413885	EPI_ISL_419774	EPI_ISL_420454	EPI_ISL_415741	EPI_ISL_416489	EPI_ISL_420327	EPI_ISL_420416
EPI_ISL_413862	EPI_ISL_419781	EPI_ISL_416029	EPI_ISL_414011	EPI_ISL_416492	EPI_ISL_417008	EPI_ISL_417420
EPI_ISL_416370	EPI_ISL_420532	EPI_ISL_416032	EPI_ISL_414010	EPI_ISL_420303	EPI_ISL_420451	EPI_ISL_420506
EPI_ISL_416387	EPI_ISL_420537	EPI_ISL_416034	EPI_ISL_416502	EPI_ISL_418067	EPI_ISL_420316	EPI_ISL_420237
EPI_ISL_416367	EPI_ISL_419773	EPI_ISL_415105	EPI_ISL_418219	EPI_ISL_417516	EPI_ISL_420352	EPI_ISL_420268
EPI_ISL_413751	EPI_ISL_419780	EPI_ISL_414045	EPI_ISL_414625	EPI_ISL_418074	EPI_ISL_417011	EPI_ISL_420750
EPI_ISL_418809	EPI_ISL_419782	EPI_ISL_416031	EPI_ISL_414600	EPI_ISL_418254	EPI_ISL_420450	EPI_ISL_420517
EPI_ISL_412872	EPI_ISL_417401	EPI_ISL_414017	EPI_ISL_414624	EPI_ISL_416491	EPI_ISL_420323	EPI_ISL_420513
EPI_ISL_419734	EPI_ISL_419778	EPI_ISL_415582	EPI_ISL_414499	EPI_ISL_417375	EPI_ISL_420318	EPI_ISL_420649
EPI_ISL_413883	EPI_ISL_419786	EPI_ISL_415587	EPI_ISL_414498	EPI_ISL_418082	EPI_ISL_418346	EPI_ISL_420265
EPI_ISL_416391	EPI_ISL_419667	EPI_ISL_418827	EPI_ISL_414504	EPI_ISL_418075	EPI_ISL_418371	EPI_ISL_420518
EPI_ISL_416397	EPI_ISL_419660	EPI_ISL_418828	EPI_ISL_416483	EPI_ISL_416685	EPI_ISL_418349	EPI_ISL_420512
EPI_ISL_416392	EPI_ISL_419668	EPI_ISL_415585	EPI_ISL_418247	EPI_ISL_418073	EPI_ISL_418852	EPI_ISL_420652
EPI_ISL_416325	EPI_ISL_417015	EPI_ISL_417259	EPI_ISL_413997	EPI_ISL_417512	EPI_ISL_418334	EPI_ISL_420642
EPI_ISL_416403	EPI_ISL_417016	EPI_ISL_417221	EPI_ISL_413019	EPI_ISL_416683	EPI_ISL_417278	EPI_ISL_420494
EPI_ISL_416330	EPI_ISL_417014	EPI_ISL_417232	EPI_ISL_417134	EPI_ISL_416516	EPI_ISL_417276	EPI_ISL_420240
EPI_ISL_416409	EPI_ISL_417930	EPI_ISL_417222	EPI_ISL_419554	EPI_ISL_419837	EPI_ISL_417277	EPI_ISL_420264
EPI_ISL_416405	EPI_ISL_417928	EPI_ISL_417264	EPI_ISL_415578	EPI_ISL_419808	EPI_ISL_417280	EPI_ISL_420490
EPI_ISL_413882	EPI_ISL_417929	EPI_ISL_417255	EPI_ISL_415743	EPI_ISL_419817	EPI_ISL_417284	EPI_ISL_420648
EPI_ISL_416340	EPI_ISL_418850	EPI_ISL_414500	EPI_ISL_415742	EPI_ISL_417410	EPI_ISL_417279	EPI_ISL_420651
EPI_ISL_416047	EPI_ISL_418377	EPI_ISL_420457	EPI_ISL_414686	EPI_ISL_419805	EPI_ISL_418667	EPI_ISL_420239
EPI_ISL_414510	EPI_ISL_418851	EPI_ISL_417254	EPI_ISL_415144	EPI_ISL_419810	EPI_ISL_416733	EPI_ISL_420510
EPI_ISL_416362	EPI_ISL_418858	EPI_ISL_414636	EPI_ISL_414008	EPI_ISL_419806	EPI_ISL_417310	EPI_ISL_420640
EPI_ISL_416398	EPI_ISL_418856	EPI_ISL_414635	EPI_ISL_414523	EPI_ISL_417409	EPI_ISL_416513	EPI_ISL_420267
EPI_ISL_416401	EPI_ISL_418813	EPI_ISL_418222	EPI_ISL_414012	EPI_ISL_419838	EPI_ISL_416511	EPI_ISL_420508
EPI_ISL_416335	EPI_ISL_418817	EPI_ISL_414637	EPI_ISL_414508	EPI_ISL_419813	EPI_ISL_416757	EPI_ISL_420271
EPI_ISL_416400	EPI_ISL_418849	EPI_ISL_417334	EPI_ISL_414506	EPI_ISL_416517	EPI_ISL_417338	EPI_ISL_420269
EPI_ISL_411218	EPI_ISL_418857	EPI_ISL_414638	EPI_ISL_414505	EPI_ISL_416518	EPI_ISL_417340	EPI_ISL_420236
EPI_ISL_407976	EPI_ISL_418379	EPI_ISL_416749	EPI_ISL_413586	EPI_ISL_419839	EPI_ISL_417337	EPI_ISL_420161
EPI_ISL_418990	EPI_ISL_418378	EPI_ISL_417333	EPI_ISL_413514	EPI_ISL_419840	EPI_ISL_416512	EPI_ISL_420654
EPI_ISL_416339	EPI_ISL_418364	EPI_ISL_416747	EPI_ISL_420799	EPI_ISL_419812	EPI_ISL_414559	EPI_ISL_420650
EPI_ISL_416425	EPI_ISL_418859	EPI_ISL_414631	EPI_ISL_413515	EPI_ISL_419811	EPI_ISL_415490	EPI_ISL_420511
EPI_ISL_417180	EPI_ISL_418814	EPI_ISL_416752	EPI_ISL_413513	EPI_ISL_419807	EPI_ISL_414551	EPI_ISL_420653
EPI_ISL_417518	EPI_ISL_417523	EPI_ISL_416494	EPI_ISL_413516	EPI_ISL_419669	EPI_ISL_414552	EPI_ISL_420266
EPI_ISL_416384	EPI_ISL_417522	EPI_ISL_416748	EPI_ISL_416484	EPI_ISL_419670	EPI_ISL_415491	EPI_ISL_420272
EPI_ISL_416345	EPI_ISL_418671	EPI_ISL_414634	EPI_ISL_416485	EPI_ISL_418632	EPI_ISL_417992	EPI_ISL_420235
EPI_ISL_416342	EPI_ISL_420645	EPI_ISL_414632	EPI_ISL_419689	EPI_ISL_418626	EPI_ISL_417997	EPI_ISL_420509
EPI_ISL_416337	EPI_ISL_418727	EPI_ISL_414633	EPI_ISL_419687	EPI_ISL_418628	EPI_ISL_418013	EPI_ISL_418317
EPI_ISL_418991	EPI_ISL_418734	EPI_ISL_417923	EPI_ISL_414019	EPI_ISL_417034	EPI_ISL_417999	EPI_ISL_420516
EPI_ISL_416353	EPI_ISL_418726	EPI_ISL_414548	EPI_ISL_413999	EPI_ISL_417940	EPI_ISL_419236	EPI_ISL_420617
EPI_ISL_416354	EPI_ISL_417315	EPI_ISL_414456	EPI_ISL_418275	EPI_ISL_418675	EPI_ISL_419237	EPI_ISL_420618
EPI_ISL_416343	EPI_ISL_418731	EPI_ISL_414448	EPI_ISL_414022	EPI_ISL_418693	EPI_ISL_417007	EPI_ISL_420619
EPI_ISL_416355	EPI_ISL_418732	EPI_ISL_414463	EPI_ISL_415698	EPI_ISL_418709	EPI_ISL_419235	EPI_ISL_420609
EPI_ISL_410718	EPI_ISL_418230	EPI_ISL_414464	EPI_ISL_414021	EPI_ISL_418702	EPI_ISL_415708	EPI_ISL_420611
EPI_ISL_410717	EPI_ISL_419535	EPI_ISL_414461	EPI_ISL_415699	EPI_ISL_420290	EPI_ISL_414619	EPI_ISL_420612
EPI_ISL_413880	EPI_ISL_417463	EPI_ISL_414531	EPI_ISL_413020	EPI_ISL_418695	EPI_ISL_417164	EPI_ISL_420604
EPI_ISL_417181	EPI_ISL_419310	EPI_ISL_414529	EPI_ISL_418271	EPI_ISL_418712	EPI_ISL_417328	EPI_ISL_420064
EPI_ISL_416358	EPI_ISL_419311	EPI_ISL_414465	EPI_ISL_414020	EPI_ISL_418723	EPI_ISL_414589	EPI_ISL_420620
EPI_ISL_410218	EPI_ISL_415486	EPI_ISL_414469	EPI_ISL_413559	EPI_ISL_418711	EPI_ISL_417393	EPI_ISL_420610
EPI_ISL_413879	EPI_ISL_415487	EPI_ISL_414466	EPI_ISL_419555	EPI_ISL_418710	EPI_ISL_417390	EPI_ISL_420607
EPI_ISL_416388	EPI_ISL_415484	EPI_ISL_414462	EPI_ISL_413561	EPI_ISL_418697	EPI_ISL_419741	EPI_ISL_420616
EPI_ISL_413867	EPI_ISL_415489	EPI_ISL_414530	EPI_ISL_417096	EPI_ISL_418694	EPI_ISL_419738	EPI_ISL_420613
EPI_ISL_413881	EPI_ISL_415488	EPI_ISL_417989	EPI_ISL_413025	EPI_ISL_418678	EPI_ISL_417391	EPI_ISL_420614
EPI_ISL_416369	EPI_ISL_418006	EPI_ISL_418011	EPI_ISL_419558	EPI_ISL_418298	EPI_ISL_417012	EPI_ISL_420615
EPI_ISL_415595	EPI_ISL_420405	EPI_ISL_420701	EPI_ISL_413558	EPI_ISL_420465	EPI_ISL_418331	EPI_ISL_420608
EPI_ISL_416682	EPI_ISL_420385	EPI_ISL_420179	EPI_ISL_413594	EPI_ISL_418673	EPI_ISL_418355	EPI_ISL_420061
EPI_ISL_415596	EPI_ISL_420379	EPI_ISL_420189	EPI_ISL_413596	EPI_ISL_418293	EPI_ISL_418322	EPI_ISL_420568
EPI_ISL_415624	EPI_ISL_420422	EPI_ISL_420529	EPI_ISL_413595	EPI_ISL_418287	EPI_ISL_418348	EPI_ISL_420583
EPI_ISL_415592	EPI_ISL_420394	EPI_ISL_420766	EPI_ISL_418799	EPI_ISL_418752	EPI_ISL_417298	EPI_ISL_420592
EPI_ISL_415600	EPI_ISL_420380	EPI_ISL_420777	EPI_ISL_412975	EPI_ISL_418674	EPI_ISL_417291	EPI_ISL_420569
EPI_ISL_419262	EPI_ISL_420413	EPI_ISL_420673	EPI_ISL_413016	EPI_ISL_418291	EPI_ISL_417294	EPI_ISL_419255
EPI_ISL_416419	EPI_ISL_418319	EPI_ISL_420702	EPI_ISL_415580	EPI_ISL_418419	EPI_ISL_417312	EPI_ISL_419254
EPI_ISL_414590	EPI_ISL_420522	EPI_ISL_420710	EPI_ISL_413892	EPI_ISL_418237	EPI_ISL_417292	EPI_ISL_418872
EPI_ISL_415619	EPI_ISL_418315	EPI_ISL_420754	EPI_ISL_413872	EPI_ISL_418239	EPI_ISL_417307	EPI_ISL_418888
EPI_ISL_415611	EPI_ISL_420255	EPI_ISL_420703	EPI_ISL_413893	EPI_ISL_418238	EPI_ISL_417265	EPI_ISL_418949
EPI_ISL_417327	EPI_ISL_418309	EPI_ISL_420661	EPI_ISL_413898	EPI_ISL_418418	EPI_ISL_417295	EPI_ISL_418952
EPI_ISL_419261	EPI_ISL_418316	EPI_ISL_420182	EPI_ISL_413899	EPI_ISL_418236	EPI_ISL_417299	EPI_ISL_418953
EPI_ISL_415620	EPI_ISL_420169	EPI_ISL_420530	EPI_ISL_413895	EPI_ISL_418235	EPI_ISL_417293	EPI_ISL_419512
EPI_ISL_415622	EPI_ISL_420521	EPI_ISL_420527	EPI_ISL_413900	EPI_ISL_418416	EPI_ISL_417305	EPI_ISL_418187
EPI_ISL_415614	EPI_ISL_418314	EPI_ISL_420672	EPI_ISL_413901	EPI_ISL_418240	EPI_ISL_417313	EPI_ISL_418186
EPI_ISL_415621	EPI_ISL_418320	EPI_ISL_420757	EPI_ISL_413868	EPI_ISL_418417	EPI_ISL_417306	EPI_ISL_418950
EPI_ISL_415617	EPI_ISL_420641	EPI_ISL_420184	EPI_ISL_413870	EPI_ISL_419551	EPI_ISL_418225	EPI_ISL_418954
EPI_ISL_415599	EPI_ISL_420226	EPI_ISL_420719	EPI_ISL_413891	EPI_ISL_419550	EPI_ISL_416758	EPI_ISL_418189
EPI_ISL_415625	EPI_ISL_420163	EPI_ISL_420187	EPI_ISL_413873	EPI_ISL_419540	EPI_ISL_417339	EPI_ISL_420807
EPI_ISL_417189	EPI_ISL_420647	EPI_ISL_420185	EPI_ISL_413897	EPI_ISL_419552	EPI_ISL_416493	EPI_ISL_418873
EPI_ISL_419749	EPI_ISL_420168	EPI_ISL_420718	EPI_ISL_413902	EPI_ISL_417468	EPI_ISL_418224	EPI_ISL_420630
EPI_ISL_419745	EPI_ISL_418308	EPI_ISL_420743	EPI_ISL_413871	EPI_ISL_418260	EPI_ISL_415653	EPI_ISL_418955
EPI_ISL_417399	EPI_ISL_420243	EPI_ISL_420191	EPI_ISL_413896	EPI_ISL_418021	EPI_ISL_419296	EPI_ISL_418945
EPI_ISL_417394	EPI_ISL_420166	EPI_ISL_420206	EPI_ISL_413869	EPI_ISL_418020	EPI_ISL_414539	EPI_ISL_418188
EPI_ISL_417400	EPI_ISL_418305	EPI_ISL_420670	EPI_ISL_413894	EPI_ISL_418017	EPI_ISL_414557	EPI_ISL_418951
EPI_ISL_419753	EPI_ISL_420753	EPI_ISL_420217	EPI_ISL_413890	EPI_ISL_418018	EPI_ISL_414537	EPI_ISL_419513
EPI_ISL_419744	EPI_ISL_420644	EPI_ISL_420178	EPI_ISL_415132	EPI_ISL_418970	EPI_ISL_415479	EPI_ISL_420007
EPI_ISL_419747	EPI_ISL_420245	EPI_ISL_420192	EPI_ISL_415135	EPI_ISL_418192	EPI_ISL_414564	EPI_ISL_420005
EPI_ISL_419751	EPI_ISL_420227	EPI_ISL_420738	EPI_ISL_414522	EPI_ISL_418052	EPI_ISL_415478	EPI_ISL_420016
EPI_ISL_419746	EPI_ISL_420230	EPI_ISL_420181	EPI_ISL_414006	EPI_ISL_419526	EPI_ISL_414536	EPI_ISL_420011
EPI_ISL_417392	EPI_ISL_420253	EPI_ISL_420734	EPI_ISL_414007	EPI_ISL_417506	EPI_ISL_414555	EPI_ISL_420013
EPI_ISL_419750	EPI_ISL_418312	EPI_ISL_420684	EPI_ISL_418220	EPI_ISL_419525	EPI_ISL_414554	EPI_ISL_420008
EPI_ISL_419765	EPI_ISL_420228	EPI_ISL_420730	EPI_ISL_414509	EPI_ISL_420018	EPI_ISL_414540	EPI_ISL_420006
EPI_ISL_419748	EPI_ISL_420247	EPI_ISL_420737	EPI_ISL_413488	EPI_ISL_418971	EPI_ISL_415481	EPI_ISL_420009
EPI_ISL_417395	EPI_ISL_420231	EPI_ISL_420740	EPI_ISL_414574	EPI_ISL_418191	EPI_ISL_414538	EPI_ISL_420017
EPI_ISL_419755	EPI_ISL_420248	EPI_ISL_420188	EPI_ISL_417922	EPI_ISL_418048	EPI_ISL_414541	EPI_ISL_420010
EPI_ISL_419752	EPI_ISL_420246	EPI_ISL_420770	EPI_ISL_413569	EPI_ISL_418050	EPI_ISL_417993	EPI_ISL_420014
EPI_ISL_417396	EPI_ISL_420761	EPI_ISL_420713	EPI_ISL_413570	EPI_ISL_416832	EPI_ISL_417994	EPI_ISL_420004
EPI_ISL_419661	EPI_ISL_420257	EPI_ISL_420155	EPI_ISL_418243	EPI_ISL_417508	EPI_ISL_417998	EPI_ISL_420012
EPI_ISL_419659	EPI_ISL_418306	EPI_ISL_420755	EPI_ISL_418273	EPI_ISL_420305	EPI_ISL_417996	EPI_ISL_420015
EPI_ISL_419665	EPI_ISL_420165	EPI_ISL_420776	EPI_ISL_415455	EPI_ISL_417510	EPI_ISL_417995	EPI_ISL_419674
EPI_ISL_418793	EPI_ISL_418321	EPI_ISL_420760	EPI_ISL_418274	EPI_ISL_417504	EPI_ISL_417991	EPI_ISL_420407
EPI_ISL_418800	EPI_ISL_420256	EPI_ISL_420735	EPI_ISL_415700	EPI_ISL_418063	EPI_ISL_414495	EPI_ISL_420408
EPI_ISL_418821	EPI_ISL_420657	EPI_ISL_420712	EPI_ISL_415454	EPI_ISL_417513	EPI_ISL_419683	EPI_ISL_419259
EPI_ISL_418826	EPI_ISL_420762	EPI_ISL_420765	EPI_ISL_419553	EPI_ISL_418190	EPI_ISL_415707	EPI_ISL_420382
EPI_ISL_418825	EPI_ISL_420225	EPI_ISL_420660	EPI_ISL_417148	EPI_ISL_416830	EPI_ISL_414616	EPI_ISL_420417
EPI_ISL_418839	EPI_ISL_420250	EPI_ISL_420739	EPI_ISL_417156	EPI_ISL_416831	EPI_ISL_414617	EPI_ISL_420425
EPI_ISL_418333	EPI_ISL_420638	EPI_ISL_420526	EPI_ISL_419560	EPI_ISL_417970	EPI_ISL_415615	EPI_ISL_420429
EPI_ISL_418822	EPI_ISL_420746	EPI_ISL_420528	EPI_ISL_417093	EPI_ISL_419256	EPI_ISL_419260	EPI_ISL_420418
EPI_ISL_418343	EPI_ISL_420233	EPI_ISL_420218	EPI_ISL_417150	EPI_ISL_419853	EPI_ISL_414621	EPI_ISL_420378
EPI_ISL_418829	EPI_ISL_420519	EPI_ISL_420215	EPI_ISL_417158	EPI_ISL_419845	EPI_ISL_415610	EPI_ISL_420389
EPI_ISL_418836	EPI_ISL_420251	EPI_ISL_420700	EPI_ISL_417094	EPI_ISL_419850	EPI_ISL_415616	EPI_ISL_420401
EPI_ISL_418369	EPI_ISL_420167	EPI_ISL_420658	EPI_ISL_417083	EPI_ISL_419844	EPI_ISL_414622	EPI_ISL_420374
EPI_ISL_418362	EPI_ISL_418311	EPI_ISL_420160	EPI_ISL_413455	EPI_ISL_417412	EPI_ISL_414618	EPI_ISL_420424
EPI_ISL_418365	EPI_ISL_418318	EPI_ISL_420669	EPI_ISL_417097	EPI_ISL_419818	EPI_ISL_417321	EPI_ISL_420406
EPI_ISL_418837	EPI_ISL_418310	EPI_ISL_420180	EPI_ISL_417152	EPI_ISL_417411	EPI_ISL_415608	EPI_ISL_420376
EPI_ISL_417521	EPI_ISL_420763	EPI_ISL_420756	EPI_ISL_417149	EPI_ISL_419846	EPI_ISL_415609	EPI_ISL_420427
EPI_ISL_420461	EPI_ISL_420749	EPI_ISL_420186	EPI_ISL_417147	EPI_ISL_419820	EPI_ISL_414620	EPI_ISL_420390
EPI_ISL_420460	EPI_ISL_420164	EPI_ISL_420758	EPI_ISL_417154	EPI_ISL_419841	EPI_ISL_417165	EPI_ISL_420391
EPI_ISL_418676	EPI_ISL_420254	EPI_ISL_420662	EPI_ISL_413560	EPI_ISL_419847	EPI_ISL_416418	EPI_ISL_420392
EPI_ISL_417314	EPI_ISL_420261	EPI_ISL_420768	EPI_ISL_417095	EPI_ISL_419814	EPI_ISL_419742	EPI_ISL_420434
EPI_ISL_416497	EPI_ISL_420656	EPI_ISL_420771	EPI_ISL_417155	EPI_ISL_419819	EPI_ISL_417389	EPI_ISL_420421
EPI_ISL_416496	EPI_ISL_418303	EPI_ISL_420156	EPI_ISL_419559	EPI_ISL_417408	EPI_ISL_419739	EPI_ISL_420426
EPI_ISL_416495	EPI_ISL_420232	EPI_ISL_420726	EPI_ISL_413557	EPI_ISL_419848	EPI_ISL_419743	EPI_ISL_420431
EPI_ISL_416745	EPI_ISL_420646	EPI_ISL_420190	EPI_ISL_414414	EPI_ISL_419854	EPI_ISL_419740	EPI_ISL_420436
EPI_ISL_416501	EPI_ISL_420023	EPI_ISL_420699	EPI_ISL_413214	EPI_ISL_419843	EPI_ISL_420320	EPI_ISL_420393
EPI_ISL_419529	EPI_ISL_420820	EPI_ISL_420811	EPI_ISL_413213	EPI_ISL_419851	EPI_ISL_418984	EPI_ISL_420399
EPI_ISL_417457	EPI_ISL_420822	EPI_ISL_420810	EPI_ISL_415159	EPI_ISL_419842	EPI_ISL_420338	EPI_ISL_420388
EPI_ISL_419298	EPI_ISL_419516	EPI_ISL_420812	EPI_ISL_414016	EPI_ISL_419720	EPI_ISL_418985	EPI_ISL_420412
EPI_ISL_419297	EPI_ISL_420825	EPI_ISL_420813	EPI_ISL_414015	EPI_ISL_419849	EPI_ISL_420452	EPI_ISL_420381
EPI_ISL_415465	EPI_ISL_420818	EPI_ISL_420026	EPI_ISL_415128	EPI_ISL_419852	EPI_ISL_418983	EPI_ISL_420433
EPI_ISL_415467	EPI_ISL_419652	EPI_ISL_420024	EPI_ISL_418345	EPI_ISL_418633	EPI_ISL_420346	EPI_ISL_420395
EPI_ISL_415470	EPI_ISL_420716	EPI_ISL_420025	EPI_ISL_415134	EPI_ISL_418629	EPI_ISL_417013	EPI_ISL_420383
EPI_ISL_415495	EPI_ISL_420525	EPI_ISL_420814	EPI_ISL_415136	EPI_ISL_418630	EPI_ISL_420445	EPI_ISL_419265
EPI_ISL_415476	EPI_ISL_420229	EPI_ISL_420823	EPI_ISL_415131	EPI_ISL_420361	EPI_ISL_418982	EPI_ISL_419266
EPI_ISL_415526	EPI_ISL_420241	EPI_ISL_420691	EPI_ISL_415140	EPI_ISL_418959	EPI_ISL_418353	EPI_ISL_420375
EPI_ISL_415468	EPI_ISL_420637	EPI_ISL_420683	EPI_ISL_415133	EPI_ISL_417925	EPI_ISL_418340	EPI_ISL_420387
EPI_ISL_415500	EPI_ISL_420643	EPI_ISL_420687	EPI_ISL_415141	EPI_ISL_417945	EPI_ISL_418830	EPI_ISL_420430
EPI_ISL_415461	EPI_ISL_420764	EPI_ISL_420704	EPI_ISL_415129	EPI_ISL_417943	EPI_ISL_418819	EPI_ISL_420377
EPI_ISL_415469	EPI_ISL_420242	EPI_ISL_420675	EPI_ISL_414626	EPI_ISL_417951	EPI_ISL_418823	EPI_ISL_420420
EPI_ISL_415492	EPI_ISL_420639	EPI_ISL_420720	EPI_ISL_413575	EPI_ISL_417949	EPI_ISL_418810	EPI_ISL_420655
EPI_ISL_418003	EPI_ISL_420659	EPI_ISL_420725	EPI_ISL_413576	EPI_ISL_418687	EPI_ISL_418820	EPI_ISL_420262
EPI_ISL_418016	EPI_ISL_420664	EPI_ISL_420693	EPI_ISL_413574	EPI_ISL_418737	EPI_ISL_418339	EPI_ISL_420259
EPI_ISL_418001	EPI_ISL_420663	EPI_ISL_420679	EPI_ISL_413581	EPI_ISL_418679	EPI_ISL_417520	EPI_ISL_420520
EPI_ISL_418000	EPI_ISL_420244	EPI_ISL_420731	EPI_ISL_420800	EPI_ISL_418763	EPI_ISL_416734	EPI_ISL_420258
EPI_ISL_419685	EPI_ISL_420224	EPI_ISL_420729	EPI_ISL_420801	EPI_ISL_418704	EPI_ISL_416735	EPI_ISL_420172
EPI_ISL_419682	EPI_ISL_420759	EPI_ISL_420678	EPI_ISL_415457	EPI_ISL_418756	EPI_ISL_416738	EPI_ISL_418302
EPI_ISL_419681	EPI_ISL_420223	EPI_ISL_420688	EPI_ISL_413023	EPI_ISL_418717	EPI_ISL_418668	EPI_ISL_420252
EPI_ISL_419680	EPI_ISL_420667	EPI_ISL_420671	EPI_ISL_413024	EPI_ISL_418706	EPI_ISL_416736	EPI_ISL_420263
EPI_ISL_416417	EPI_ISL_420524	EPI_ISL_420195	EPI_ISL_413022	EPI_ISL_418691	EPI_ISL_416739	EPI_ISL_420170
EPI_ISL_415594	EPI_ISL_420665	EPI_ISL_420197	EPI_ISL_415456	EPI_ISL_418743	EPI_ISL_415150	EPI_ISL_420515
EPI_ISL_419706	EPI_ISL_420717	EPI_ISL_420686	EPI_ISL_413021	EPI_ISL_418295	EPI_ISL_417311	EPI_ISL_420173
EPI_ISL_416452	EPI_ISL_420249	EPI_ISL_420709	EPI_ISL_415459	EPI_ISL_418755	EPI_ISL_420459	EPI_ISL_420260
EPI_ISL_415602	EPI_ISL_420666	EPI_ISL_420677	EPI_ISL_417142	EPI_ISL_418690	EPI_ISL_415654	EPI_ISL_418307
EPI_ISL_416445	EPI_ISL_420752	EPI_ISL_420732	EPI_ISL_417145	EPI_ISL_418705	EPI_ISL_418226	EPI_ISL_420514
EPI_ISL_416444	EPI_ISL_420162	EPI_ISL_420747	EPI_ISL_417146	EPI_ISL_418715	EPI_ISL_419299	EPI_ISL_420171
EPI_ISL_419263	EPI_ISL_420523	EPI_ISL_420689	EPI_ISL_417108	EPI_ISL_418707	EPI_ISL_415466	EPI_ISL_418304
EPI_ISL_417191	EPI_ISL_420819	EPI_ISL_420676	EPI_ISL_417160	EPI_ISL_418754	EPI_ISL_414565	EPI_ISL_418313
EPI_ISL_416439	EPI_ISL_420821	EPI_ISL_420708	EPI_ISL_414476	EPI_ISL_418720	EPI_ISL_415496	EPI_ISL_420636
EPI_ISL_416672	EPI_ISL_420824	EPI_ISL_420714	EPI_ISL_417099	EPI_ISL_418688	EPI_ISL_414553	EPI_ISL_420234
EPI_ISL_416660	EPI_ISL_420668	EPI_ISL_420727	EPI_ISL_417151	EPI_ISL_418680	EPI_ISL_415508	EPI_ISL_420624
EPI_ISL_416447	EPI_ISL_420724	EPI_ISL_420705	EPI_ISL_417100	EPI_ISL_420289	EPI_ISL_415531	EPI_ISL_420622
EPI_ISL_416434	EPI_ISL_420183	EPI_ISL_420158	EPI_ISL_417098	EPI_ISL_418716	EPI_ISL_415497	EPI_ISL_420625
EPI_ISL_419712	EPI_ISL_420210	EPI_ISL_420695	EPI_ISL_419557	EPI_ISL_418685	EPI_ISL_415504	EPI_ISL_420621
EPI_ISL_418966	EPI_ISL_420741	EPI_ISL_420722	EPI_ISL_417168	EPI_ISL_418700	EPI_ISL_415532	EPI_ISL_420623
EPI_ISL_415581	EPI_ISL_420045	EPI_ISL_420114	EPI_ISL_417153	EPI_ISL_418683	EPI_ISL_415460	EPI_ISL_418861
EPI_ISL_417219	EPI_ISL_418421	EPI_ISL_420118	EPI_ISL_417172	EPI_ISL_418684	EPI_ISL_415502	EPI_ISL_418913
EPI_ISL_417229	EPI_ISL_420038	EPI_ISL_420112	EPI_ISL_413457	EPI_ISL_418722	EPI_ISL_415480	EPI_ISL_418902
EPI_ISL_415145	EPI_ISL_420047	EPI_ISL_420119	EPI_ISL_416461	EPI_ISL_418698	EPI_ISL_415498	EPI_ISL_418897
EPI_ISL_417224	EPI_ISL_420042	EPI_ISL_419678	EPI_ISL_419561	EPI_ISL_418297	EPI_ISL_415510	EPI_ISL_420808
EPI_ISL_414013	EPI_ISL_418423	EPI_ISL_417952	EPI_ISL_420791	EPI_ISL_418682	EPI_ISL_415463	EPI_ISL_418944
EPI_ISL_414524	EPI_ISL_418424	EPI_ISL_420123	EPI_ISL_417101	EPI_ISL_418708	EPI_ISL_415462	EPI_ISL_418891
EPI_ISL_415146	EPI_ISL_418420	EPI_ISL_417978	EPI_ISL_416465	EPI_ISL_418689	EPI_ISL_415473	EPI_ISL_418939
EPI_ISL_417217	EPI_ISL_418427	EPI_ISL_419676	EPI_ISL_417318	EPI_ISL_418714	EPI_ISL_414544	EPI_ISL_418924
EPI_ISL_415149	EPI_ISL_418261	EPI_ISL_419686	EPI_ISL_417159	EPI_ISL_418692	EPI_ISL_415482	EPI_ISL_418916
EPI_ISL_417213	EPI_ISL_418257	EPI_ISL_420113	EPI_ISL_419556	EPI_ISL_418686	EPI_ISL_415530	EPI_ISL_420809
EPI_ISL_415139	EPI_ISL_419304	EPI_ISL_420124	EPI_ISL_417161	EPI_ISL_418681	EPI_ISL_415529	EPI_ISL_418915
EPI_ISL_417236	EPI_ISL_418027	EPI_ISL_417972	EPI_ISL_416460	EPI_ISL_418738	EPI_ISL_415511	EPI_ISL_418935
EPI_ISL_415130	EPI_ISL_418026	EPI_ISL_417969	EPI_ISL_420796	EPI_ISL_418703	EPI_ISL_415533	EPI_ISL_418909
EPI_ISL_415147	EPI_ISL_418025	EPI_ISL_420121	EPI_ISL_417143	EPI_ISL_418701	EPI_ISL_415512	EPI_ISL_420817
EPI_ISL_416503	EPI_ISL_418023	EPI_ISL_419684	EPI_ISL_417166	EPI_ISL_418713	EPI_ISL_415474	EPI_ISL_418905
EPI_ISL_417921	EPI_ISL_418024	EPI_ISL_420117	EPI_ISL_415154	EPI_ISL_420041	EPI_ISL_415483	EPI_ISL_418920
EPI_ISL_417421	EPI_ISL_418198	EPI_ISL_420115	EPI_ISL_415156	EPI_ISL_419168	EPI_ISL_418014	EPI_ISL_418876
EPI_ISL_417423	EPI_ISL_418194	EPI_ISL_419688	EPI_ISL_418987	EPI_ISL_418426	EPI_ISL_418015	EPI_ISL_418914
EPI_ISL_417419	EPI_ISL_417507	EPI_ISL_420116	EPI_ISL_415158	EPI_ISL_418422	EPI_ISL_419677	EPI_ISL_418900
EPI_ISL_417418	EPI_ISL_418972	EPI_ISL_420120	EPI_ISL_415155	EPI_ISL_418425	EPI_ISL_417975	EPI_ISL_418938
EPI_ISL_414542	EPI_ISL_418864	EPI_ISL_415618	EPI_ISL_415157	EPI_ISL_418428	EPI_ISL_420122	EPI_ISL_418877
EPI_ISL_413588	EPI_ISL_418202	EPI_ISL_415613	EPI_ISL_420415	EPI_ISL_420409	EPI_ISL_420816	EPI_ISL_419514
EPI_ISL_420437	EPI_ISL_420400	EPI_ISL_420384	EPI_ISL_420438	EPI_ISL_420423	EPI_ISL_420414	EPI_ISL_418898
EPI_ISL_420439	EPI_ISL_420440	EPI_ISL_420403	EPI_ISL_420435	EPI_ISL_420815	EPI_ISL_420402	EPI_ISL_418881
EPI_ISL_420410	EPI_ISL_420428	EPI_ISL_420404	EPI_ISL_420419	EPI_ISL_419515
